# Supplementary material for: A two-dimensional polydodecameric water–chloride cluster enfolding (Hg–Cl–Hg)+concealed cascade cryptate
Source: Royal Society of Chemistry journal article supplement (doi:10.1039/c4ce00802b), 2014-05-30
Supplement: c4ce00802b1.pdf [file c4ce00802b1.pdf]

# Two dimensional polydodecameric water-chloride cluster enfolding (Hg-Cl-Hg)<sup>+</sup> concealed cascade cryptate accomplished through reductive-encapsulation using Hg(II) and a homoditopic octaaza cryptand

Anita Pati, Jeyaraman Athilakshmi, Venkatachalam Ramkumar and Dillip Kumar Chand\*

## SUPPORTING INFORMATION

All the ligands have been synthesized by using known methods. Other starting materials were of commercially available reagent quality unless otherwise stated. Melting points were recorded by using Tempo melting point apparatus in capillary tube and are uncorrected. FT-IR spectra were recorded in KBr pellets on a JASCO FT-IR-4100 spectrophotometer. NMR has been recorded by using Bruker Avance-500 and 400MHz spectrometer and using commercially available deuterated solvents. Single crystal X-ray diffraction data collection was performed with a Bruker AXS Kappa Apex II CCD diffractometer. Thermogravimetric analysis (TGA) data were collected on a Q500 Hi-Res TGA instrument under Nitrogen atmosphere in the temperature range 30-900 °C with a heating rate of 20 °C/min.

### **Synthesis of Dimercury (I) cryptate [Hg<sub>2</sub>Cl(L1)]Cl.12H<sub>2</sub>O (1):**

To a magnetically stirred solution of **L1** (53mg, 0.088mmol) in MeOH: H<sub>2</sub>O (1:1, 5mL), a solution of HgCl<sub>2</sub> (47.52mg, 0.176mmol) in MeOH: H<sub>2</sub>O (1:1, 5mL) was added slowly. A white precipitate came out soon after the addition of the HgCl<sub>2</sub> to the solution of **L1** in MeOH: H<sub>2</sub>O which became soluble after few minutes. Then the reaction mixture was stirred for 12h at room temperature. Then it was centrifuged and the clear solution thus obtained was kept for slow evaporation of the solvent. Nice crystalline solid for complex **1** (111mg, 98%) was obtained after 4days.

**Physical appearance:** Colorless crystalline solid

**Yield:** (111mg, 98%), **m.p:** > 300 °C, Anal. calcd for (C<sub>36</sub>H<sub>78</sub>Cl<sub>2</sub>Hg<sub>2</sub>N<sub>8</sub>O<sub>12</sub> – 1.5 H<sub>2</sub>O): C, 34.31; H, 6.00; N, 8.89. Found: C, 34.13; H, 6.11; N, 9.01%.

**IR (neat):** 3398, 3312, 3231, 3197, 2956, 2921, 2861, 1668, 1637, 1518, 1457, 1355, 1281, 1215, 1162, 1078, 1059, 1027, 996, 940, 877, 811, 713, 619 cm<sup>-1</sup>.

**<sup>1</sup>H NMR (500 MHz, DMSO-d<sub>6</sub>):** δ 7.49 (bs, 12H, Ar-H), 4.26 (bs, 12H, Bn-H), 3.30 (bs, 12H, NH-CH<sub>2</sub>), 3.21 (bs, 12H, N-CH<sub>2</sub>).

**Synthesis of the metal complex [Hg(L2)Cl]Cl (2):**

To a magnetically stirred solution of **L2** (41.66mg, 0.1mmol) in MeOH: H<sub>2</sub>O (1:1, 5mL), a solution of HgCl<sub>2</sub> (27.15mg, 0.1mmol) in MeOH: H<sub>2</sub>O (1:1, 5mL) was added slowly. A dark grey precipitate came out soon after the addition of the HgCl<sub>2</sub> to the solution of **L2** in MeOH: H<sub>2</sub>O which became soluble after few minutes. Then the reaction mixture was stirred for 12h at room temperature. Then it was centrifuged and the clear solution thus obtained was kept for slow evaporation of the solvent. Nice crystalline solid for complex **2** (67 mg, 97.3%) was obtained after 5days.

**Physical appearance:** Colorless crystalline solid

**Yield:** (67mg, 97.3%), **m.p.:** 195-200 °C, Anal. calcd for C<sub>27</sub>H<sub>36</sub>Cl<sub>2</sub>HgN<sub>4</sub>: C, 47.13; H, 5.27; N, 8.14. Found: C, 47.49; H, 5.93; N, 8.45%.

**IR (neat):** 3421, 3156, 3061, 3027, 2917, 2851, 1635, 1602, 1497, 1454, 1395, 1349, 1205, 1164, 1094, 998, 829, 748, 701, 619 cm<sup>-1</sup>.

**<sup>1</sup>H NMR (500 MHz, DMSO-d<sub>6</sub>):** δ 7.99-7.85 (m, 15H, Ar-H), 4.5 (bs, 6H, Bn-H), 3.23 (bs, 6H, NH-CH<sub>2</sub>), 3.19 (bs, 6H, N-CH<sub>2</sub>).

**<sup>13</sup>C NMR (125 MHz, DMSO-d<sub>6</sub>, DEPT):** δ 137.69 (3 X C, Ar-C-CH<sub>2</sub>), 128.94 (6 X CH, Ar-C), 128.52 (3 X CH, Ar-C), 127.58 (3 X CH, Ar-C), 52.97 (3 X CH<sub>2</sub>, Bn-CH<sub>2</sub>), 51.40 (3 X CH<sub>2</sub>, NH-CH<sub>2</sub>), 42.94 (3 X CH<sub>2</sub>, N-CH<sub>2</sub>).

Ligand L1

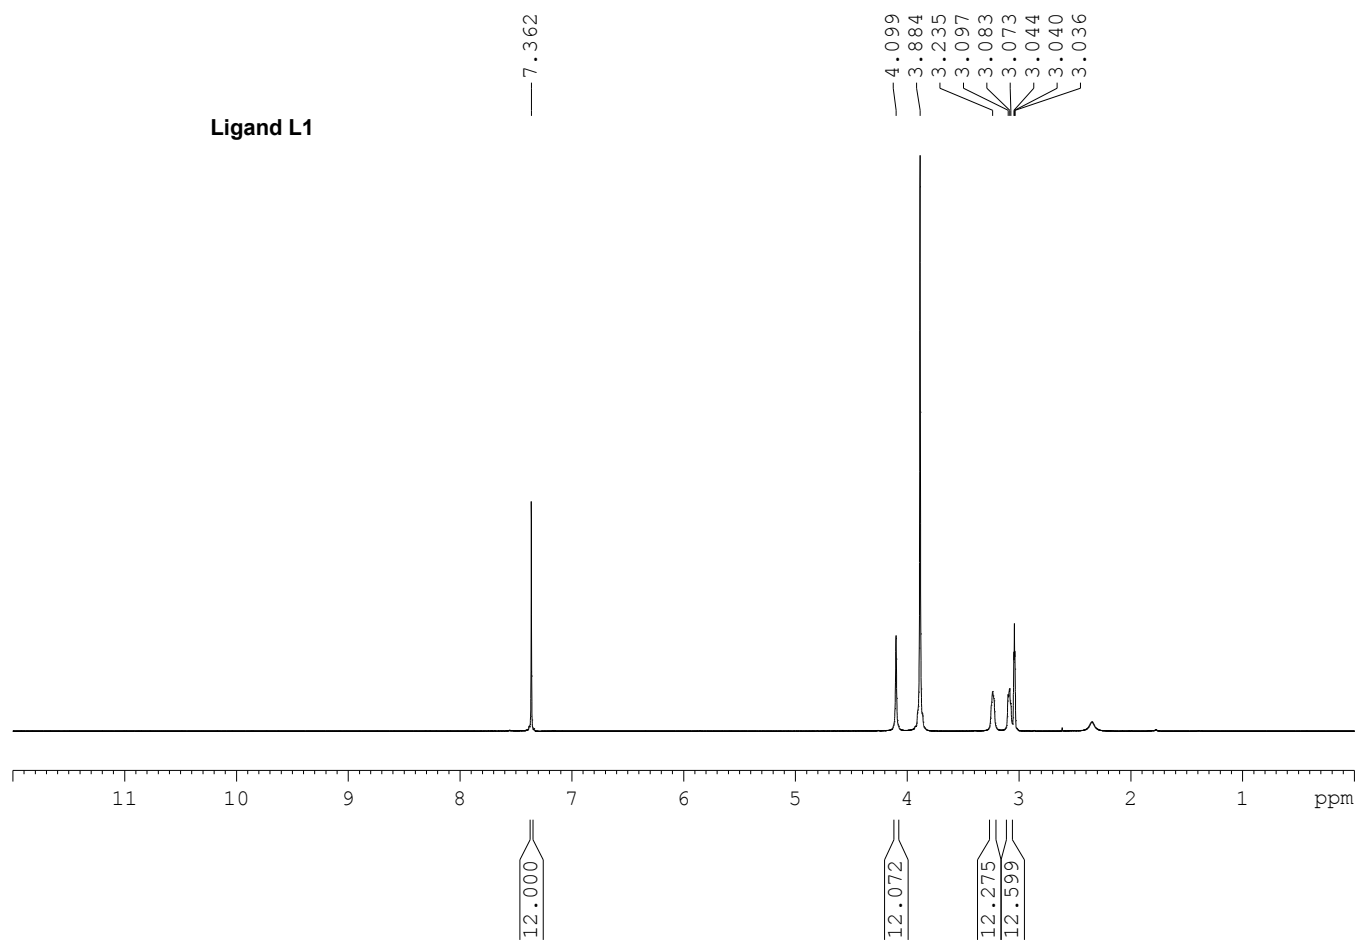

Figure S-1. 400 MHz  $^1\text{H}$  NMR spectrum of Ligand L1 in DMSO- $d_6$ .

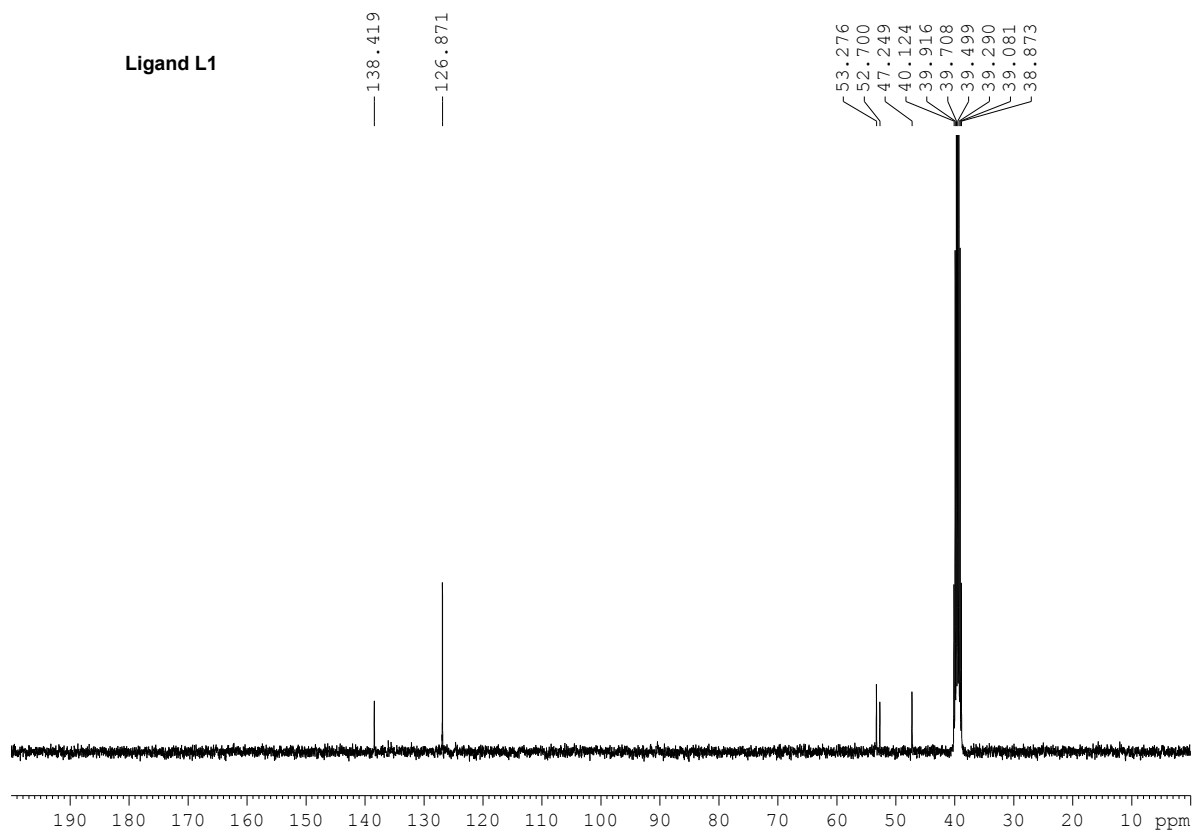

**Figure S-2.** 100 MHz  $^{13}\text{C}$  NMR spectrum of Ligand L1 in DMSO- $d_6$ .

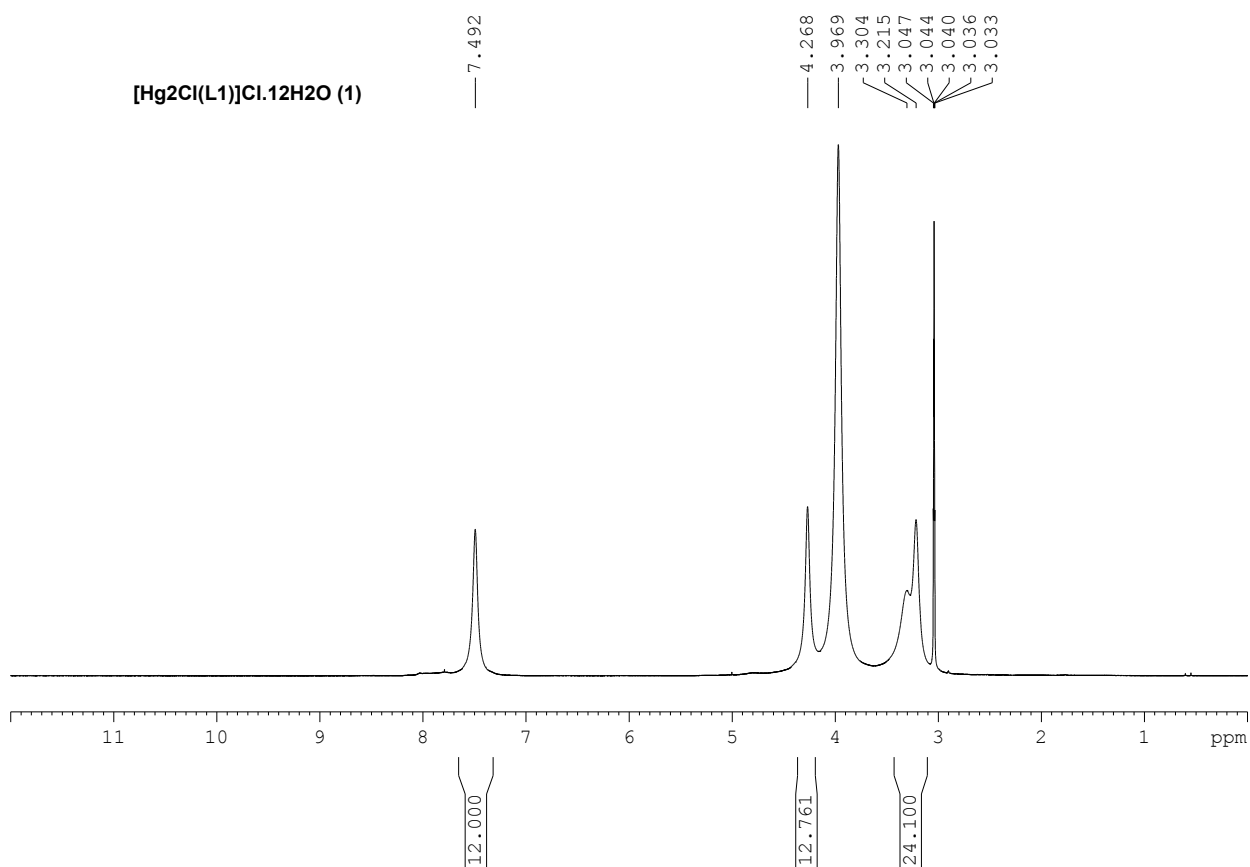

**Figure S-3.** 500 MHz  $^1\text{H}$  NMR spectrum of  $[\text{Hg}_2\text{Cl}(\text{L1})]\text{Cl}\cdot 12\text{H}_2\text{O}$ , **1** in DMSO- $d_6$ .

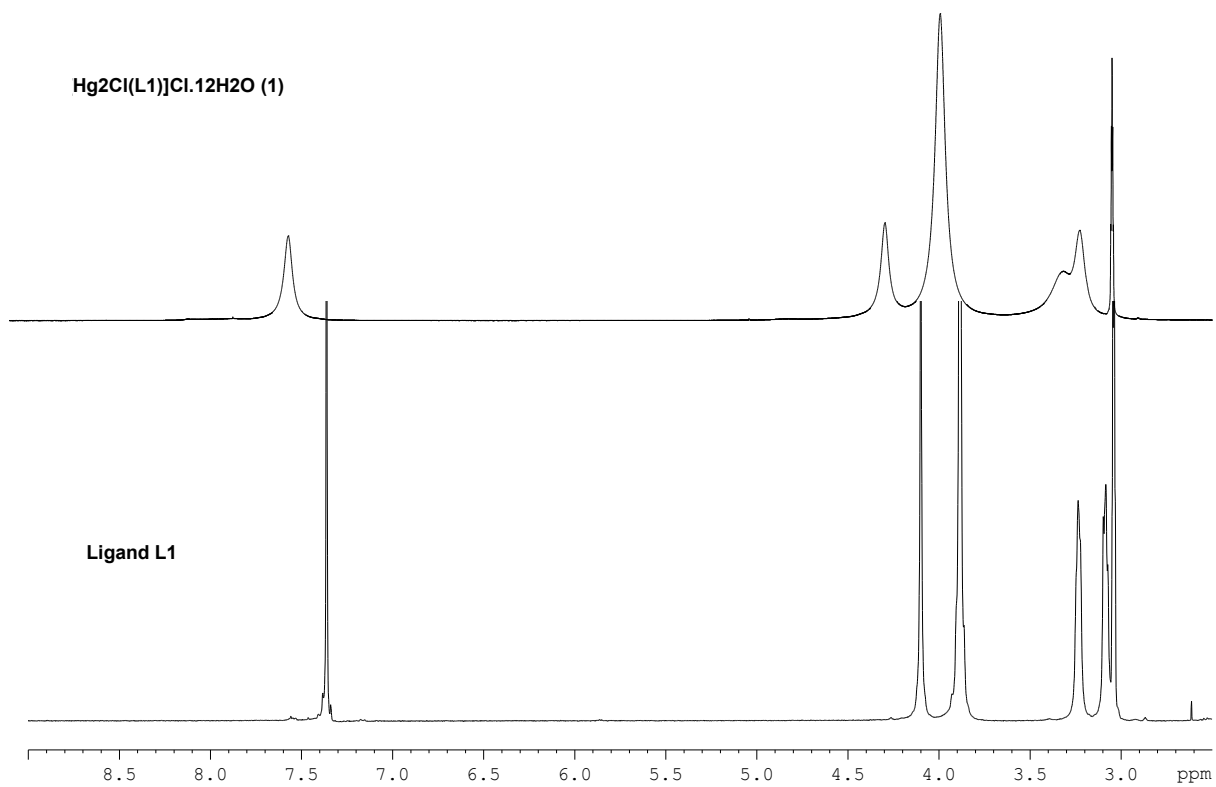

**Figure S-4.** Stacking diagram of <sup>1</sup>H NMR spectrum of Ligand L1 and [Hg<sub>2</sub>Cl(L1)]Cl.12H<sub>2</sub>O, **1**.

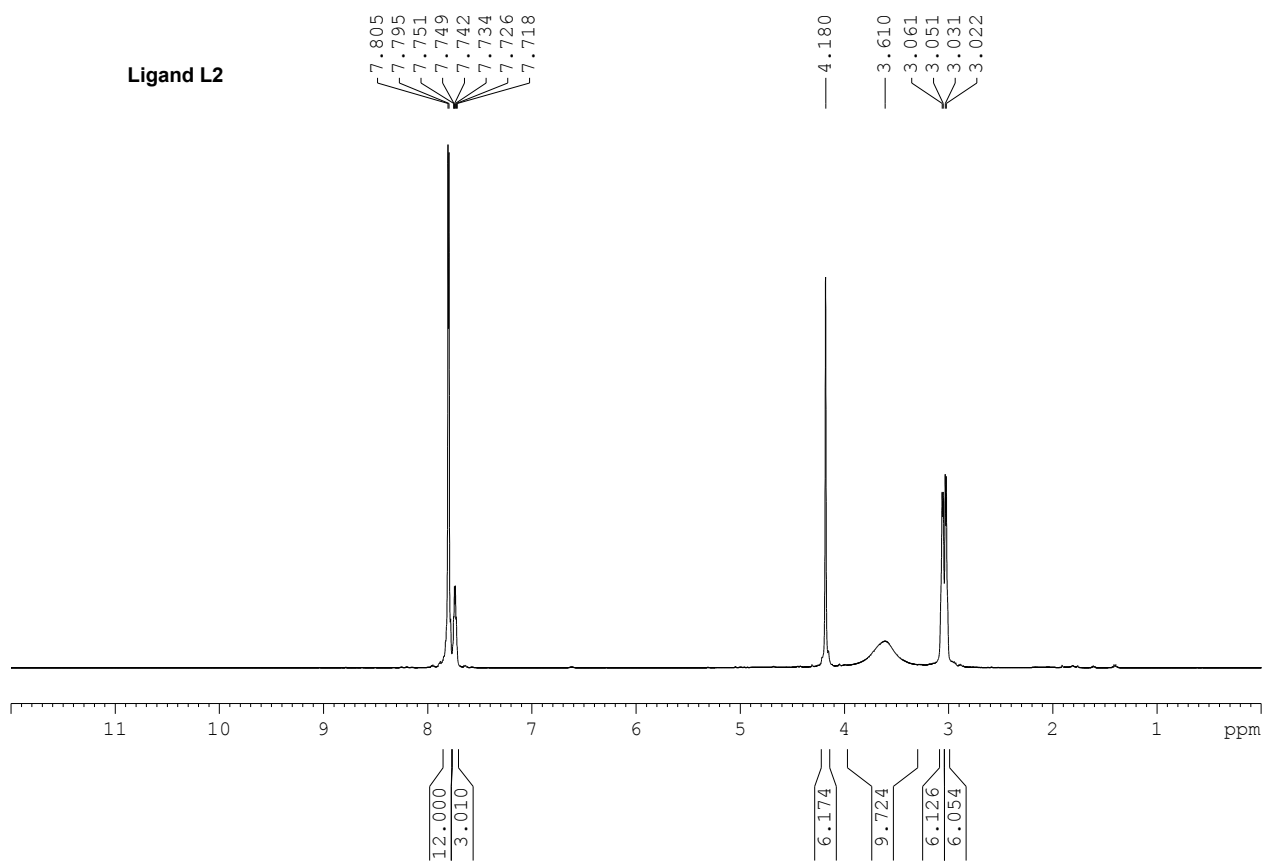

**Figure S-5.** 500 MHz <sup>1</sup>H NMR spectrum of Ligand L2 in DMSO-d<sub>6</sub>.

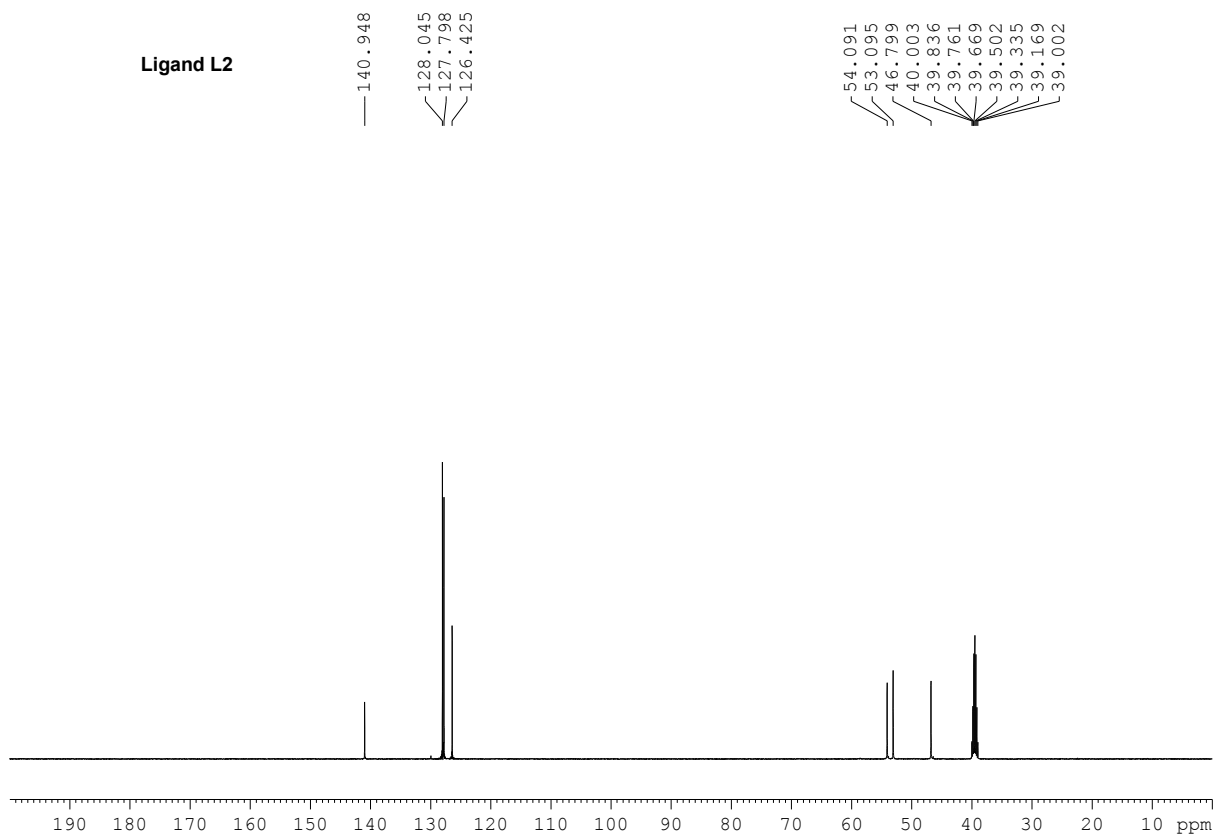

**Figure S-6.** 125.76 MHz  $^{13}\text{C}$  NMR spectrum of Ligand **L2** in DMSO- $d_6$ .

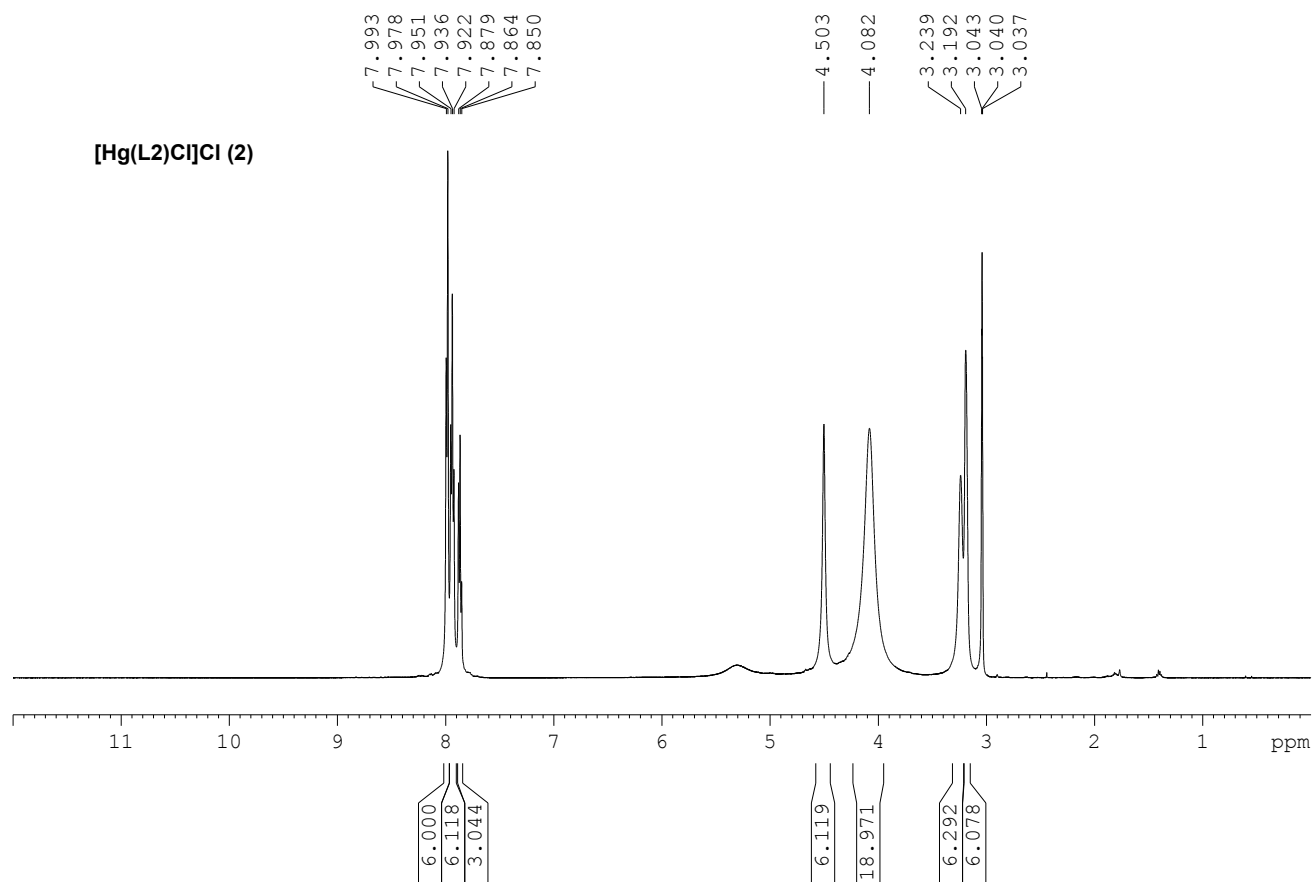

**Figure S-7.** 500 MHz  $^1\text{H}$  NMR spectrum of  $[\text{Hg}(\text{L2})\text{Cl}]\text{Cl}$ , **2** in DMSO- $d_6$ .

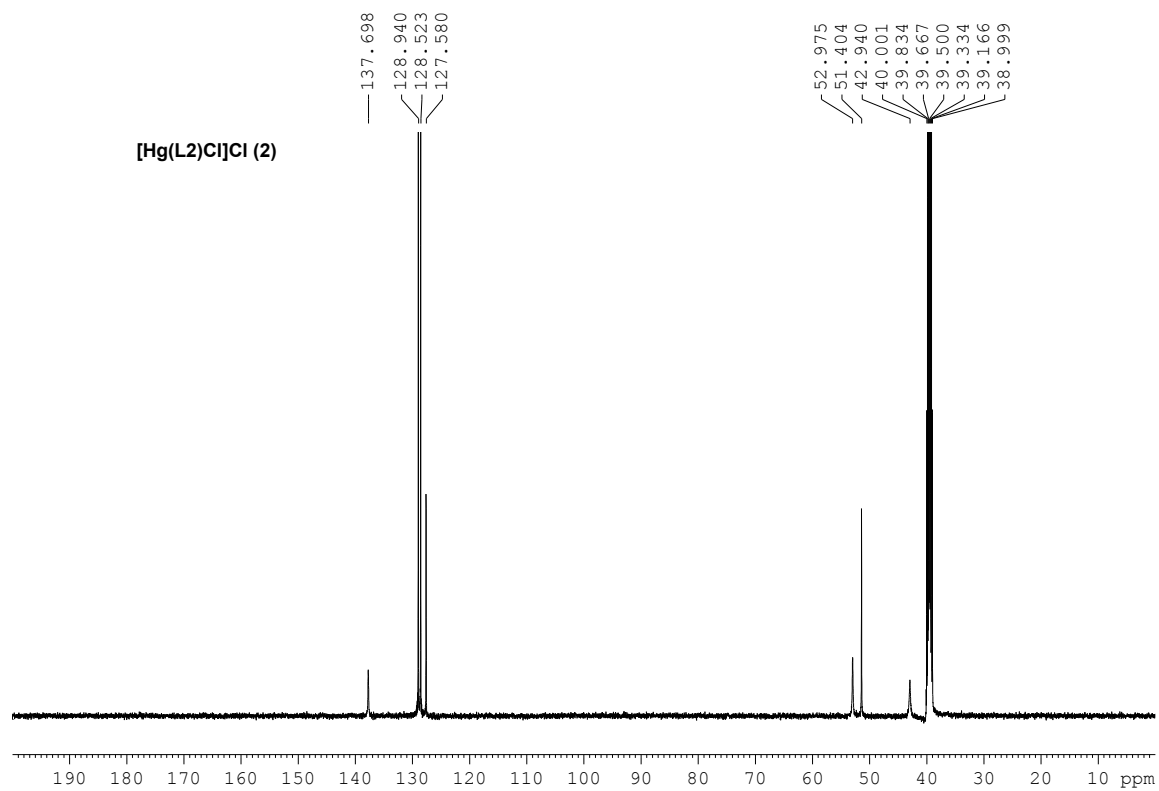

**Figure S-8.** 125.76 MHz  $^{13}\text{C}$  NMR spectrum of  $[\text{Hg}(\text{L}2)\text{Cl}]\text{Cl}$ , **2** in  $\text{DMSO-}d_6$ .

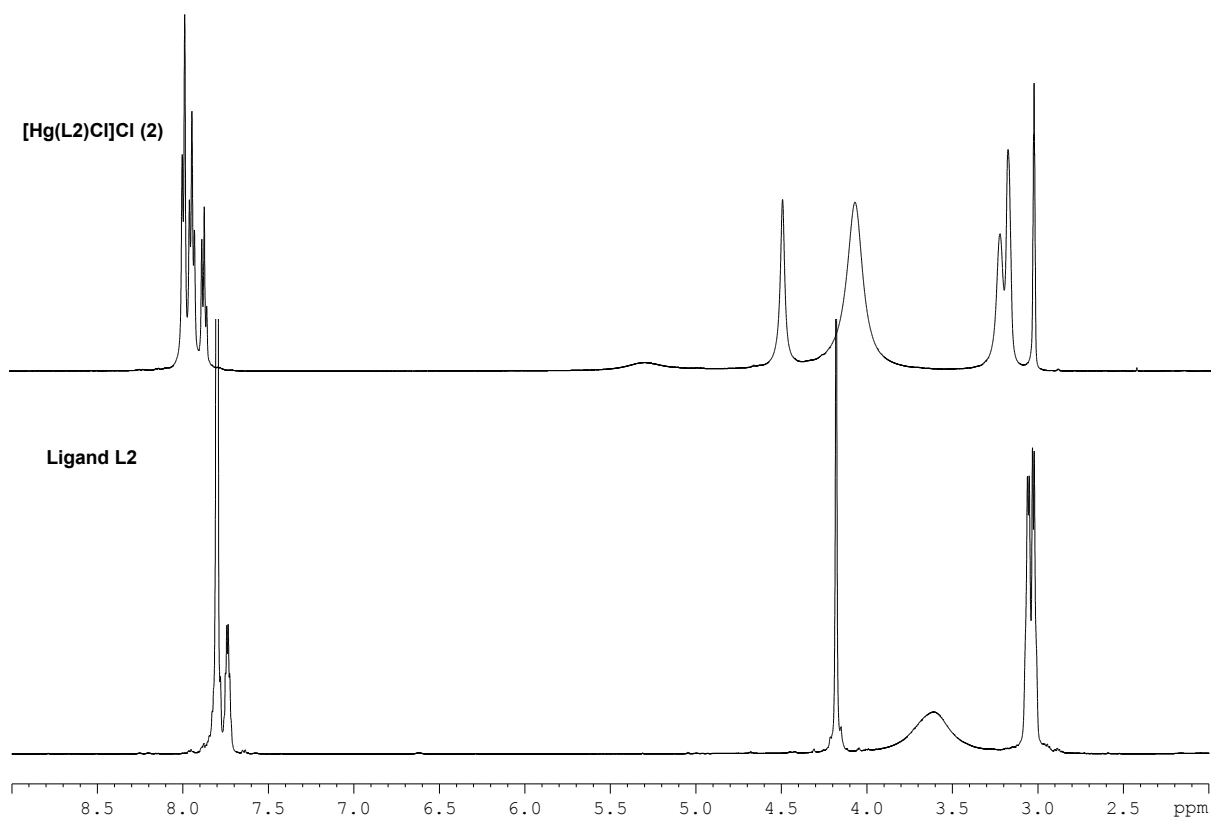

**Figure S-9.** Stacking diagram of  $^1\text{H}$  NMR spectrum of Ligand **L2** and  $[\text{Hg}(\text{L}2)\text{Cl}]\text{Cl}$ , **2**.

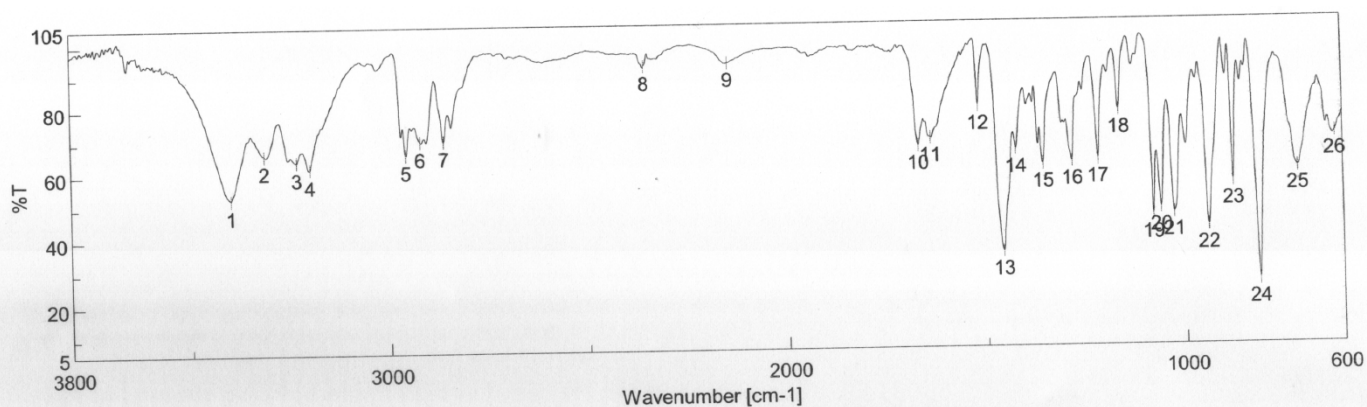

[ Result of Peak Picking ]

| No. | Position | Intensity | No. | Position | Intensity | No. | Position | Intensity |
|-----|----------|-----------|-----|----------|-----------|-----|----------|-----------|
| 1   | 3398     | 52.3763   | 2   | 3312     | 65.9028   | 3   | 3231     | 63.8242   |
| 4   | 3197     | 61.4718   | 5   | 2956     | 65.624    | 6   | 2921     | 69.5903   |
| 7   | 2861     | 69.676    | 8   | 2356     | 92.119    | 9   | 2145     | 92.9818   |
| 10  | 1668     | 66.5795   | 11  | 1637     | 68.8956   | 12  | 1518     | 78.5399   |
| 13  | 1457     | 34.0104   | 14  | 1423     | 65.1194   | 15  | 1355     | 60.5011   |
| 16  | 1281     | 61.2741   | 17  | 1215     | 61.7571   | 18  | 1162     | 76.7853   |
| 19  | 1078     | 44.6329   | 20  | 1059     | 46.8077   | 21  | 1027     | 45.2571   |
| 22  | 940      | 41.2065   | 23  | 877      | 54.5846   | 24  | 811      | 24.5064   |
| 25  | 713      | 58.8522   | 26  | 619      | 69.2262   |     |          |           |

Figure S-10. IR spectrum of  $[\text{Hg}_2\text{Cl}(\text{L1})]\text{Cl}\cdot 12\text{H}_2\text{O}$ , **1**.

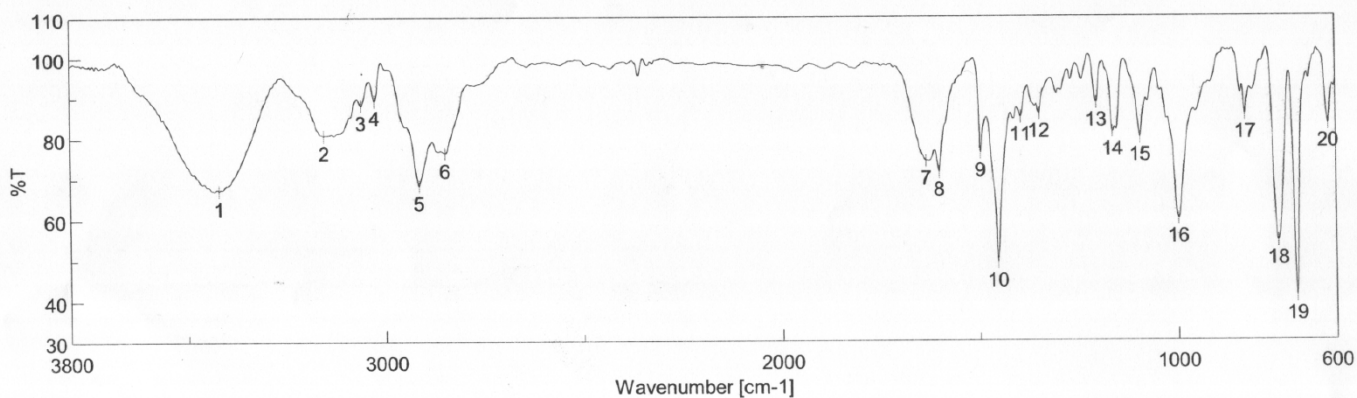

[ Result of Peak Picking ]

| No. | Position | Intensity | No. | Position | Intensity | No. | Position | Intensity |
|-----|----------|-----------|-----|----------|-----------|-----|----------|-----------|
| 1   | 3421     | 67.005    | 2   | 3156     | 80.5974   | 3   | 3061     | 88.0258   |
| 4   | 3027     | 89.221    | 5   | 2917     | 68.2208   | 6   | 2851     | 76.1883   |
| 7   | 1635     | 74.1415   | 8   | 1602     | 71.3655   | 9   | 1497     | 76.0303   |
| 10  | 1454     | 48.9427   | 11  | 1395     | 84.8013   | 12  | 1349     | 85.6334   |
| 13  | 1205     | 88.2881   | 14  | 1164     | 81.1595   | 15  | 1094     | 79.6992   |
| 16  | 998      | 59.7705   | 17  | 829      | 85.2892   | 18  | 748      | 54.3061   |
| 19  | 701      | 40.6542   | 20  | 619      | 83.0488   | 21  | 481      | 88.0098   |
| 22  | 438      | 89.614    | 23  | 419      | 84.1651   |     |          |           |

Figure S-11. IR spectrum of  $[\text{Hg}(\text{L2})\text{Cl}]\text{Cl}$ , **2**.



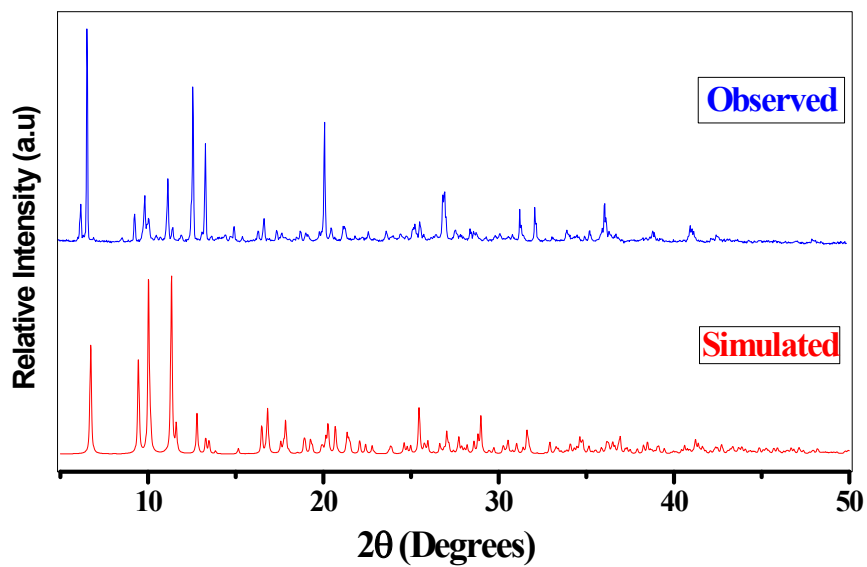

Figure S-12. Observed and Simulated PXRD pattern of  $[\text{Hg}_2\text{Cl}(\text{L1})]\text{Cl}\cdot 12\text{H}_2\text{O}$ , 1.

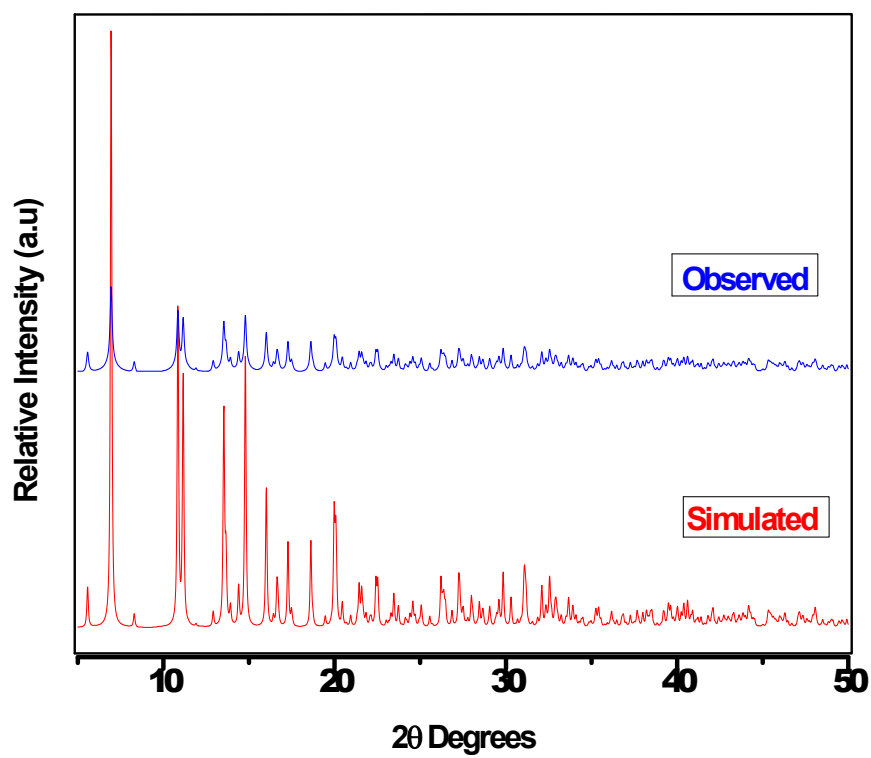

Figure S-13. Observed and Simulated PXRD pattern of  $[[\text{Hg}(\text{L2})\text{Cl}]\text{Cl}$ , 2.

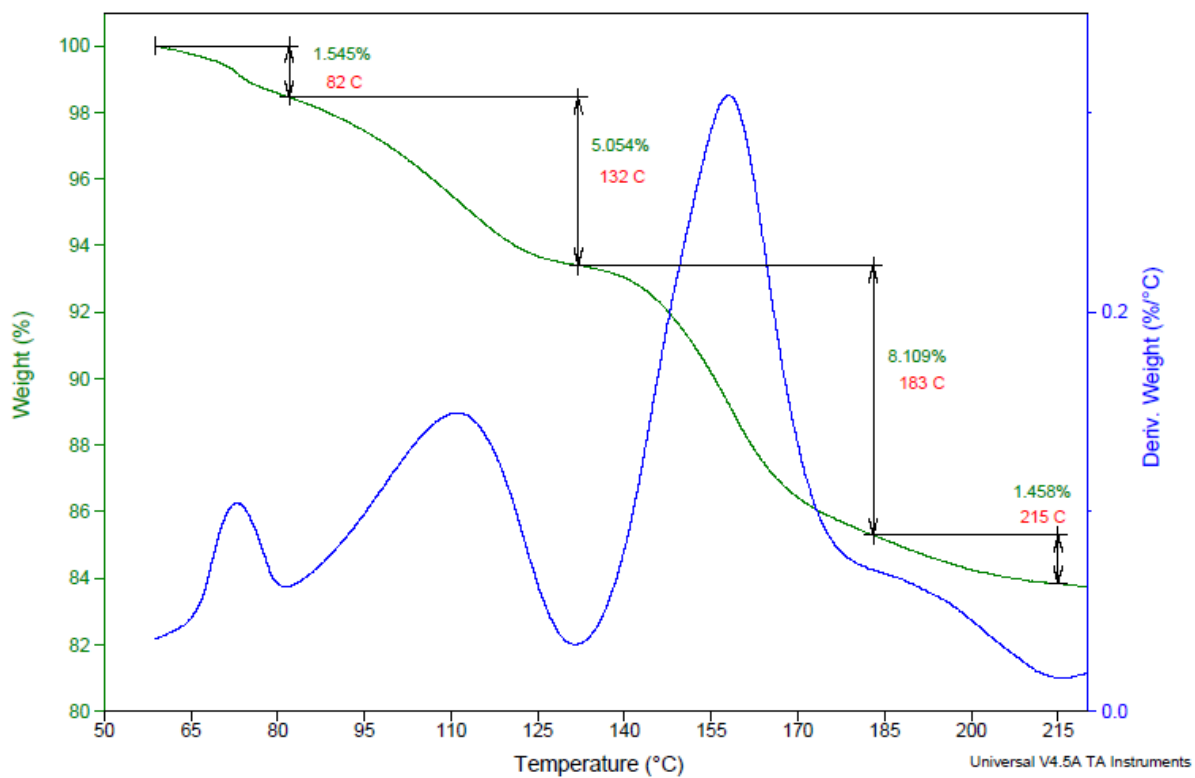

Figure S-14. TGA Curve for  $[\text{Hg}_2\text{Cl}(\text{L}1)]\text{Cl} \cdot 12\text{H}_2\text{O}$ , 1.

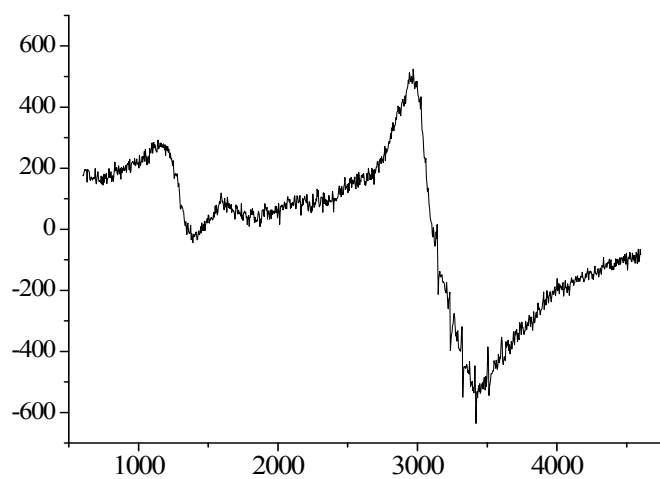

Figure S-15. The powder EPR spectra of  $[\text{Hg}_2\text{Cl}(\text{L}1)]\text{Cl} \cdot 12\text{H}_2\text{O}$ , 1. (X- band, RT, calibrated using diphenylpicrylhydrazyl (DPPH)).

**Table S-1.** Crystal data and structure refinement parameters for the complexes **1** and **2**.

| Compounds                                                           | <b>1</b>                                                                                       | <b>2</b>                                                              |
|---------------------------------------------------------------------|------------------------------------------------------------------------------------------------|-----------------------------------------------------------------------|
| Empirical Formula                                                   | C <sub>36</sub> H <sub>52</sub> Cl <sub>2</sub> Hg <sub>2</sub> N <sub>8</sub> O <sub>12</sub> | C <sub>27</sub> H <sub>38</sub> Cl <sub>1.5</sub> Hg N <sub>4</sub> O |
| Formula Weight                                                      | 1260.93                                                                                        | 688.38                                                                |
| Crystal System                                                      | Monoclinic                                                                                     | Monoclinic                                                            |
| Space Group                                                         | C2/c                                                                                           | P 21/c                                                                |
| <i>a</i> (Å)                                                        | 10.1044(5)                                                                                     | 16.052(9)                                                             |
| <i>b</i> (Å)                                                        | 18.7022(8)                                                                                     | 21.298(12)                                                            |
| <i>c</i> (Å)                                                        | 26.5462(12)                                                                                    | 8.932(5)                                                              |
| <i>α</i> (°)                                                        | 90.00                                                                                          | 90.00                                                                 |
| <i>β</i> (°)                                                        | 98.448(2)                                                                                      | 99.10(2)                                                              |
| <i>γ</i> (°)                                                        | 90.00                                                                                          | 90.00                                                                 |
| Volume (Å) <sup>3</sup>                                             | 4962.1(4)                                                                                      | 3015(3)                                                               |
| <i>Z</i>                                                            | 4                                                                                              | 4                                                                     |
| Wavelength (Å)                                                      | 0.71073                                                                                        | 0.71073                                                               |
| Temperature(K)                                                      | 298(2)                                                                                         | 298(2)                                                                |
| Calculated density (g/cm <sup>3</sup> )                             | 1.688                                                                                          | 1.516                                                                 |
| Absorption coefficient (mm <sup>-1</sup> )                          | 6.348                                                                                          | 5.262                                                                 |
| F(000)                                                              | 2456                                                                                           | 1366                                                                  |
| Crystal Dimensions (mm) <sup>3</sup>                                | 0.42 X 0.38 X 0.35                                                                             | 0.35 X 0.20 X 0.18                                                    |
| $\theta$ range for data collection (°)                              | 1.551 to 24.999                                                                                | 1.602 to 25.00                                                        |
| Limiting indices                                                    | -12 ≤ <i>h</i> ≤ 12,<br>-18 ≤ <i>k</i> ≤ 22,<br>-31 ≤ <i>l</i> ≤ 31                            | -18 ≤ <i>h</i> ≤ 18,<br>-25 ≤ <i>k</i> ≤ 25,<br>-9 ≤ <i>l</i> ≤ 10    |
| Reflections collected / unique                                      | 14135/4350                                                                                     | 15883/5040                                                            |
| Data / restraints / Parameter                                       | 4350/0/281                                                                                     | 5040/ 6/ 279                                                          |
| GOF                                                                 | 1.017                                                                                          | 1.025                                                                 |
| Final <sup>a</sup> <i>R</i> indices<br>[ <i>I</i> > 2σ( <i>I</i> )] | <i>R</i> 1 = 0.0407<br><i>wR</i> 2 = 0.1012                                                    | <i>R</i> 1 = 0.0871<br><i>wR</i> 2 = 0.2432                           |
| <i>R</i> indices (all data)                                         | <i>R</i> 1 = 0.0509<br><i>wR</i> 2 = 0.1059                                                    | <i>R</i> 1 = 0.1549<br><i>wR</i> 2 = 0.3047                           |
| CCDC                                                                | 785896                                                                                         | 966453                                                                |
